1 **Main Manuscript for**

2 ***N*-glucosyltransferase GbNGT1 from *Ginkgo* complement auxin metabolic pathway**

3 Qinggang Yin<sup>a,b</sup>, Jing Zhang<sup>a</sup>, Shuhui Wang<sup>a</sup>, Jintang Cheng<sup>a</sup>, Han Gao<sup>a</sup>, Cong Guo<sup>a</sup>, Lianbao  
4 Ma<sup>c</sup>, Limin Sun<sup>d</sup>, Shilin Chen<sup>a</sup>, and An Liu<sup>a\*</sup>

5 <sup>a</sup> Key Laboratory of Beijing for Identification and Safety Evaluation of Chinese Medicine,  
6 Institute of Chinese Materia Medica, China Academy of Chinese Medical Sciences, Beijing  
7 100700, China

8 <sup>b</sup> Artemisinin Research Center, China Academy of Chinese Medical Sciences, Beijing  
9 100700, China

10 <sup>c</sup> Institute of Ginkgo, Pizhou, Jiangsu 221300, China.

11 <sup>d</sup> State Forestry and Grassland Administration Key Laboratory of Silviculture in downstream  
12 areas of the Yellow River, College of Forestry, Shandong Agricultural University, Tai'an,  
13 271000, Shandong, China.

14

15 \*To whom correspondence should be addressed. Email: [aliu@icmm.ac.cn](mailto:aliu@icmm.ac.cn)

16

17

18

19

20

21 **Highlight:**

22

23 The N-glucosylation of IAA or IAA-amino acids in auxin metabolism had been neglected  
24 over decades, our work for GbNGT1 redeems the missing chain of auxin metabolic pathway.

25

26 **Abstract**

27

28 As a group of the most important phytohormone, auxin homeostasis is regulated in a complex  
29 manner. Generally, auxin conjugations especially IAA glucosides are dominant on high auxin  
30 level conditions. Former terminal glucosylation researches mainly focus on *O*-position, while  
31 IAA-*N*-glucoside or IAA-Asp-*N*-glucoside has been neglected since their found in 2001. In  
32 our study, IAA-Asp-*N*-glucoside was firstly found specifically abundant (as high as 4.13  
33 mg/g) in ginkgo seeds of 58 cultivars from Ginkgo Resource Nursery built in 1990.  
34 Furthermore, a novel *N*-glucosyltransferase GbNGT1, which could catalyze IAA-Asp and  
35 IAA to form their corresponding *N*-glucoside, was identified through differential  
36 transcriptome analysis and *in vitro* enzymatic test. The enzyme was demonstrated to possess  
37 specific catalyze capacity toward the *N*-position of IAA-amino acid or IAA among 52  
38 substrates, and was typical of acid tolerance, metal ion independence and high temperature  
39 sensitivity. Docking and site-directed mutagenesis of this enzyme confirmed that E15G  
40 mutant could almost abolish enzyme catalytic activity towards IAA-Asp and IAA *in vitro* and  
41 *in vivo*. The IAA modification of GbNGT1 and GbGH3.5 was verified by transient expression  
42 assay in *Nicotiana benthamiana*. In conclusion, our results complement the terminal  
43 metabolic pathway of auxin, and the specific catalytic function of GbNGT1 towards IAA-  
44 amino acid provide a new way to biosynthesis indole-amide compounds.

45

46 **Keywords :** Auxin, indole-3-acetic acid, glucosyltransferase, IAA-amino acid, N-  
47 glucosylation, GH3 family

48

49 **Main Text**

50

51 **Introduction**

52

53 The plant hormone auxin (indole-3-acetic acid, IAA) was discovered about 70 years ago. Our  
54 understanding of IAA signaling pathway has thrived during the last few decades, in contrast,  
55 key enzymes in its metabolic pathway were missing and the regulation of auxin metabolism  
56 was poorly understood (Ljung, 2013). In plant, IAA level could be attenuated by conjugation  
57 (mainly to amino acids and sugars) (Staswick *et al.*, 2005); IAA conjugates are regarded as  
58 either reversible or irreversible storage compounds, although their functions and their  
59 regulation genes during plant growth and development is still under investigating (Korasick  
60 *et al.*, 2013).

61

62 Amide-linked IAA conjugates (IAA-AA) constitute approximately 90% of the IAA pool in  
63 *Arabidopsis thaliana* (Tam *et al.*, 2000). Many enzymes involved in IAA conjugation and  
64 IAA conjugate hydrolysis have been identified, such as auxin-inducible GRETCHEN  
65 HAGEN3 (GH3) family of amido synthases and different amido hydrolases (Staswick *et al.*,  
66 2005). Since glycosylation can alter many characteristics of aglycones in respect to their  
67 bioactivity, solubility, as well as their cellular localization, the procedure is considered as an  
68 important regulatory mechanism for cellular homeostasis and phytohormone activity  
69 (Ostrowski *et al.*, 2014). Szerszen *et al.* (1994) firstly cloned an IAGlc synthase cDNA as  
70 coding an *O*-glycosyltransferase (OGT, IAGLU) from a maize library by antibodies  
71 (Szerszen *et al.*, 1994). Subsequently, UGT84B1, UGT74E2, and UGT74D1 were identified  
72 sharing similar function with IAGlc synthase to form 1-*O*-IAA-glucoside in *Arabidopsis*  
73 (Jackson *et al.*, 2001). Until Ljung *et al.* (2001) detected IAA-*N*-glucoside and IAA-Asp-*N*-  
74 glucoside in Scots pine (*Pinus sylvestris*), researchers started to notice the new metabolic  
75 branch for IAA (Ljung *et al.*, 2001). However, no *N*-glycosyltransferase (NGT) gene was  
76 found up to now, even though another two new IAGlc synthases, OsIAGT1 and OsIAGLU

77 were recently reported to produce IAA-*O*-glucoside in rice (*Oryza sativa*) (Liu *et al.*, 2019;  
78 Yu *et al.*, 2019).

79

80 Compared with *O*-glucosyltransferase (OGTs) reported in plant, NGTs were rarely identified,  
81 especially for small molecules and metabolites (Guo *et al.*, 2015). IAA-*N*-glucoside was  
82 thought to be an irreversible form of IAA, for it's harder to be hydrated by hydrolases than  
83 the IAA-*O*-glucoside (Casanova-Sánchez *et al.*, 2019). Known NGTs not only always possess  
84 substrate diversity, but also function as OGT, *S*-glucosyltransferase (SGT) or *C*-  
85 glucosyltransferase (CGT). AtUGT72B1 (*A. thaliana*), a NGT, was demonstrated to  
86 glucosylate toward the OH of 2, 4, 5-trichlorophenol, NH<sub>2</sub> of 2, 3-dichloroaniline and SH of  
87 4-chlorothiophenol (Brazier-Hicks *et al.*, 2007). MiCGT (*Mangifera indica*) exhibited a  
88 robust capability of stereospecific *C*-glycosylation for 35 structural diverse drugs, such as  
89 scaffolds and simple phenols, using UDP-glucose as sugar donor. In the meanwhile, it could  
90 also form *O*- and *N*-glycosides (Chen *et al.*, 2015). In medicinal plant, TcCGT1 (*Trollius*  
91 *chinensis*) was confirmed to catalyze *C*-, *O*-, *N*-, and *S*-glycosylation reactions(He *et al.*,  
92 2019). The substrates specificity of glycosyltransferases mainly depend on their structures,  
93 rather than their preliminary sequences (Ostrowski *et al.*, 2014). Combined with crystal  
94 structure of PtUGT1 (*Polygonum tinctorium*) which could glucosylate the OH of indoxyl  
95 (Hsu *et al.*, 2018), the available structures of the above GTs could be used to explore the  
96 structural mechanism of NGTs for IAA.

97

98 Herein, we firstly found IAA-Asp-*N*-glucoside abundantly accumulated in ginkgo seeds,  
99 which was identified to inhibit cough (Liu *et al.*, 2018). The content of IAA-Asp-*N*-glucoside  
100 in 58 ginkgo cultivars from China and Japan (two cultivars were introduced from Japan in  
101 1990s) were among 1.02-4.13 mg/g D. W., significantly higher than that in rice seeds (~ 0.03  
102 µg/g D. W.) (Kai *et al.*, 2007). We found a unique GbNGT1 could catalyze *N*-position and  
103 format IAA-Asp-*N*-glucoside and IAA-*N*-glucoside through screening candidate GbUGTs  
104 from differential transcriptomes of ginkgo seeds and leaves. Using UDP-glucose as sugar

105 donor, GbNGT1 specifically glucosylated the *N*-position of IAA-AAs or IAA among 52  
106 substrates in enzymatic experiment. Docking analysis and site-directed mutagenesis  
107 experiments demonstrated that the E15 residue played critical role in *N*-glucosylating activity  
108 *in vitro* and *in vivo*. The *in vivo* function of GbNGT1 was confirmed by transient expression  
109 assay in *Nicotiana benthamiana*. These results not only improved the metabolic pathway of  
110 IAA, but also provided new tools for its protein engineering and biosynthetic research.

## 111 **Materials and methods**

112

### 113 **Materials and chemicals**

114

115 Ginkgo leaves, seed coats and seeds at different developing stages from June 15th to  
116 September 15th were collected in Beijing botanical garden; it is about 70 years old. Mature  
117 seeds of 58 cultivars were collected on October in Pizhou Resource Nursery. These samples  
118 were immediately frozen in liquid nitrogen, and stored at -80°C for further use. The substrates  
119 tested in the study were purchased from Xili Limited Co. (Shanghai, China) and Indofine  
120 (Hillsborough, NJ, USA). UDP-glucose, UDP-galactose and UDP-glucuronic acid were  
121 purchased from Sigma-Aldrich (Oakville, CA, USA). UDP-rhamnose was enzymatic  
122 synthesized using methods mentioned in Rautengarten et al. (2014) (Rautengarten *et al.*,  
123 2014). All chemicals used in this study were analytical or HPLC grade.

124

### 125 **Chemical synthesis of Substrates**

126

127 Sixteen substrates were synthesized using chemical methods, including *N*-indole 3-acetyl-L-  
128 aspartic acid dimethyl ester (IAA-Asp (OMe)-OMe), *N*-indole 3-acetyl-L-aspartic acid (IAA-  
129 Asp), *N*-5-methylindole 3-acetyl-L-aspartic acid (IAA-Me-IAA-Asp), *N*-5-bromoindole 3-  
130 acetyl-L-aspartic acid (5-Br-IAA-Asp), *N*-indole 3-acetyl-L-glutamic acid dimethyl ester  
131 (IAA-Glu (OMe)-OMe), *N*-indole 3-acetyl-L-glutamic acid (IAA-Glu), *N*-5-methylindole 3-

132 acetyl-L-glutamic acid (5-Me-IAA-Glu), N-5-bromoindole 3-acetyl-L-glutamic acid (5-Br-  
133 IAA-Glu), N-indole 3-acetyl-glycine (IAA-Gly), N-5-methylindole 3-acetyl-glycine (5-Me-  
134 IAA-Gly), N-5-bromoindole 3-acetyl-glycine (5-Br-IAA-Gly), N-indole 3-acetyl-leucine  
135 (IAA-Leu), N-5-methylindole 3-acetyl-leucine (5-Br-IAA-Leu). The synthesis steps and  
136 compound structures were confirmed by NMR as (Appendix S).

137

### 138 **Analysis of IAA-AA-N-glucosides metabolites by HPLC**

139

140 50 mg dry weight sample was extracted with 2.5 ml methanol (25%) in an ultrasonic bath at  
141 25°C for 30 min. Then the supernatant was filtered through a membrane (pore diameter is  
142 0.22  $\mu\text{m}$ ) after centrifugating (12, 000 rpm) for 10 min under 4°C. Finally, a 10  $\mu\text{l}$  aliquot  
143 was injected for subsequent analysis. The HPLC was used to determine the components based  
144 on the followed chromatographic separation terms with 280 nm or 220 nm detecting  
145 wavelength.

146

147 Chromatographic separation was achieved on a Venusil innoval C18 (250 mm  $\times$  4.6 mm, 5  
148  $\mu\text{m}$ ), with column temperature maintaining at 30 °C, auto-sampler temperature setting at 4 °C,  
149 using 0.1% formic acid in water and acetonitrile as solvent A and B. The injection volume  
150 per sample was 10  $\mu\text{L}$  and the flow rate was 1.0 mL/min. Elution conditions were as follows:  
151 0-30 min, B from 5% to 100%; 30-35 min, B from 100% to 100%.

152

### 153 **RNA-seq, candidate genes' sequence analysis and gene clone**

154 In order to examine the expression patterns of GbUGT and GbGH3s genes associated with  
155 IAA-N-glucoside and IAA-AA-glycosides biosynthetic pathway, RNAs from leaves and  
156 seeds of different developing stages were sequenced by Illumina HiSeq2000 platform. RNA  
157 extraction, sequencing and reads filtering were followed as previously described in Yin *et*

158 *al.*,(2020) (Yin *et al.*, 2020). Finally, thirteen GbUGT genes and eleven GbGH3s were  
159 selected according to the published genome and transcriptome of *G. biloba*. Multiple  
160 sequence alignment of deduced amino acid sequences was carried out by DNAMAN;  
161 predicted amino acid sequences of UGTs and GH3s were aligned using Clustal X2. Then,  
162 mixed cDNAs from leaves and seeds of *G. biloba* were used for gene amplification. For  
163 GbUGTs, the PCR products were purified and digested using the corresponding restriction  
164 enzymes, and then ligated to a pMAL-c2x vector (New England BioLabs, Ipswich, MA, USA)  
165 digested with the same restriction enzymes for expression of recombinant proteins in  
166 *Escherichia coli*. For *GbGH3s* and *AtGH3.6* genes, gateway system was used to construct  
167 pK7WG2D vector for verified the IAA modification in *planta*.

168

## 169 **Enzyme assay and products identification**

170

171 Purification of recombinant UGT proteins in *E. coli* and enzymatic activity tests were done  
172 with minor modifications as previously described (Yin *et al.*, 2017). In enzymatic test or  
173 kinetic analysis of the recombinant GbUGT proteins, purified enzymes (1-2  $\mu\text{g}$ ) were  
174 incubated in reaction mixtures comprising 10 mM DTT, 50 mM Tris-HCl (pH 7.0), and 2  
175 mM UDP-glucose, UDP-glucuronic acid, UDP-galactose, or UDP-rhamnose crude (20  $\mu\text{l}$   
176 enzymatic crude solution containing UDP-rhamnose), in a final volume of 50  $\mu\text{l}$ . The  
177 concentration of the tested acceptor substrates ranged from 100 to 2000  $\mu\text{M}$ . Reactions was  
178 stopped by adding methanol after 30 min's incubation at 37°C. Samples were centrifuged at  
179 14, 000 rpm for 10 min under 4°C, and further analyzed by HPLC using above mentioned  
180 procedure. The kinetic parameters  $K_m$  and  $k_{cat}$  were calculated by the Hyper 32 program  
181 (<http://hyper32.software.informer.com/>).

182

183 Enzymatic reaction solution was filtered through 0.22  $\mu\text{m}$  membranes, 10  $\mu\text{L}$  aliquot was  
184 used to analyze new products by HPLC, and then 1  $\mu\text{L}$  aliquot was injected in UPLC-MS/MS

185 to identify the products. UPLC-QTOF-MS/MS detection used 6540 Agilent 1260 photodiode  
186 array. Electrospray ionization (ESI) was applied in positive (PI) mode for MS and MS/MS to  
187 collect fragments information of the molecular weighs. The positive mode parameters were  
188 optimized as follows: HV voltage, 3.5 kV; capillary, 0.095  $\mu$ A; nozzle voltage, 1500 V; gas  
189 flow, 8 L  $\text{min}^{-1}$ ; gas temp, 320°C; nebulizer, 35 psi; sheath gas temp, 350°C; Sheath gas flow,  
190 12 L  $\text{min}^{-1}$ ; and scan range at m/z 50-1250 units. Collision energy of 15V was used during  
191 MS/MS analysis.

192

### 193 **Homology modeling and docking statistic**

194

195 Homology models of GbNGT1 were built, using the 3D structure of UGT72B1 (PDB No.  
196 2VCH) and PtUGT1 (5NLM) as template, through SWISS-MODEL server at  
197 <http://swissmodel.expasy.org>. UDP-Glucose and IAA-Asp were respectively docking with  
198 the model structure of GbNGT1 using igemdock 2.1 program. The model with UDP-Glc and  
199 IAA-Asp was visualized by Pymol molecular graphics system at <http://www.pymol.org>.

200

### 201 **Functional Characterization of GbNGT1 in *N. benthamiana***

202

203 *GbNGT1*, mutant *E15G*, *AtGH3.6* (F24B18.13, At5g54510) and *GbGH3s* sequence were  
204 subcloned into the binary vector pK7WG2D by Gateway LR protocol. The *A. tumefaciens*  
205 GV3101 clone which contained *GbNGT1*, *GbGH3s*, *AtGH3.6* or *E15G* gene was incubated  
206 in 50 mL LB culture (containing 50 mg  $\text{L}^{-1}$  spectinomycin, 50 mg  $\text{L}^{-1}$  rifampicin) for  
207 overnight growth (200 rpm, 28°C). The culture was centrifuged for 10 min under 3000 $\times$ g,  
208 and *A. tumefaciens* precipitation was resuspended and washed with infiltration buffer (10 mM  
209 MES, 10 mM  $\text{MgCl}_2$ , and 100  $\mu$ M acetosyringone). The bacterial solution was adjusted to a  
210 final  $\text{OD}_{600 \text{ nm}}=0.5$ . The transiently transformation assay was conducted on 4-week *N.*



211 *benthamiana* plants growing under 16/8 h light/dark rhythms through leaf infiltration. LB 985  
212 NightShade (Berthold Technologies) and OLYMPUS IX73 were used to determine whether  
213 *GbNGT1*, *E15G*, *AtGH3.6* or *GFP* were transiently expressed in tobacco leaves (Fig S2). After  
214 24 h, the substrates IAA (4 mM) or IAA-Asp (4 mM) were infiltrated to the leaves of  
215 transformed above genes *N. benthamiana* respectively. Subsequently, the infected leaves  
216 were harvested, weighed (during 100-200 mg), grounded and then extracted with 500  $\mu$ L  
217 methanol solution ( $V_{\text{methanol}}: V_{\text{water}}=7:3$ ). After sonicated for 30 minutes, the samples were  
218 centrifuged at 12,000 rpm and filtered through membrane (pore diameter is 0.22  $\mu$ m).  
219 Finally, 10  $\mu$ l aliquot was applied for HPLC quantified analysis, and 1  $\mu$ l samples were used  
220 to UPLC-QTOF qualified analysis.

221

## 222 **Statistical analysis**

223

224 Statistical analyses were performed by Excel (Microsoft Office, Microsoft). P-values were  
225 calculated using an unpaired, two-tailed Student's *t* test (\*\**p* < 0.01; \**p* < 0.05; ns, not  
226 significant). Data represent means  $\pm$  standard deviation (*n*  $\geq$  3).

227

## 228 **Accession numbers**

229 GenBank accession number MN908522 represents *GbNGT1* or *UGT717A21*; while,  
230 MN908517 for *GbGH3.5*. The details of other candidate genes were listed in table S3.

231

## 232 **Results**

233

### 234 **IAA-AA-N-glucosides concentrated in *G. biloba* seeds**

235

236 IAA-AA-N-glucosides were confirmed to be pharmacological activity compounds in cough  
237 treatment in ginkgo seeds (Liu et al. 2018). NMR determined these compounds including  
238 IAA-Asp-N-glucoside and IAA-Glu-N-glucoside, which commonly distributed in mature

239 seeds of 58 ginkgo cultivars or strains from Pizhou Resource Nursery built in 1990  
240 (Supporting Information Figure S1&Table S1). The minimum content of IAA-Asp-*N*-  
241 glucoside is 1.02 mg/g D.W. in “Dalongyan, Anhui Quanjiao”, while the maximum content  
242 is up to 4.13 mg/g D.W. in “No. 18 Xincun”. The content of IAA-Glu-*N*-glucoside is less  
243 than that of IAA-Asp-*N*-glucoside, ranging from 0.24 to 1.23 mg/g D.W. in “No. 1-6, Hubei  
244 Anlu” and “No. 2, Guizhou Zhengnan” respectively. It is worth mentioning that two cultivars  
245 from Japan also accumulated high content of IAA-AA-*N*-glucosides; the content of IAA-  
246 Asp-*N*-glucoside and IAA-Glu-*N*-glucoside in “Hisatoshi” or Jiushou” is 2.51 and 0.63 mg/g  
247 D. W., while in “Teng Kuo” or Tengjiulang” is 1.88 and 0.55 mg/g D.W, respectively.

248

249 Concurrently, we analyzed IAA-AA-*N*-glucosides content in different tissues of various  
250 developmental stages from June 15th to September 15th, including leaves, seed coats and  
251 seeds (Figure 1a). IAA-Asp-*N*-glucoside content in seeds (ranging from 1.5-2.0 mg/g D.W.)  
252 was at least 10-fold higher than that in seed coats (ranging from 0.07-0.20 mg/g D.W.) and  
253 leaves (ranging from 0.05-0.13 mg/g D.W.); whereas, IAA-Glu-*N*-glucoside content span in  
254 different tissues is smaller, in seeds that was 0.60-0.80 mg/g D.W., in seed coats was 0.04-  
255 0.06 mg/g D.W., and in leaves was 0.21-0.30 mg/g D.W. The IAA-Asp-*N*-glucoside content  
256 in seeds and leaves reached the peak in July, while in seed coats it gradually decreased from  
257 June to September. IAA-Glu-*N*-glucoside content of seeds, seed coats and leaves reached the  
258 maximum at July, June and August, respectively.

259

260 To be amazed, the presumed precursors IAA-AA or IAA-*N*-glucoside of IAA-AA-*N*-  
261 glucoside were extremely trace existed in all tested tissues; these compounds could only be  
262 qualitatively detected by UPLC-Q-TOF. The significant difference in contents of IAA-AA-  
263 *N*-glucosides and their precursors indicated that there must be some UGTs existed in ginkgo  
264 seeds which efficiently catalyzed the *N*-glucosylation of IAA-AA.

265

## 266 **Identification of ginkgo *N*-glucosyltransferase towards IAA and IAA-AA**

267

268 Using Arabidopsis UGTs as queries, GbUGTs were screened from the available genome of  
269 *G. biloba* (Guan *et al.*, 2016); concomitantly, final GbUGTs source was formed by UGTs  
270 containing the conserve domain PSPG (Plant Secondary Product Glycosyltransferase) boxes  
271 of plant UGTs. Combined with differential transcriptome analysis of *G. biloba*, 9 GbUGTs  
272 were cloned out of 13 candidates (Figure 1b, Supporting Information Table S2&3). In the  
273 prokaryotic expression experiment (Supporting Information Figure S2), GbUGT8  
274 recombinant protein was identified to be able to catalyze IAA-Asp to produce a new product  
275 using UDP-glucose as sugar donor. Comparing to the substrate, the new product gained 162  
276 molecular weight detected by Mass spectrometry and was further identified as IAA-Asp-*N*-  
277 glucoside by NMR analysis (Figure 1c & Supporting Information Table S4). However,  
278 GbUGT8 could not catalyze IAA-Asp to produce new products using UDP-galactose, UDP-  
279 glucuronic acid or UDP-rhamnose as sugar donor. Similar to Asm25 (*Actinosynnema*  
280 *pretiosum*), which catalyzes *in vitro* glycation of PNDs at the macrolactam amide nitrogen  
281 position using UDP-glucose as the sole sugar donor (Zhao *et al.*, 2008), GbUGT8 could only  
282 use UDP-glucose as sugar donor to catalyze *N*-glucosylation of IAA-Asp. Then it was finally  
283 named as GbNGT1.

284

285 Meanwhile, it was found that the recombinant protein also could catalyze the *N*-glucosylation  
286 of IAA (Figure 1d). The mass spectrum showed that the new product was IAA glucoside, but  
287 not IAA-*O*-glucoside judging by retention time of the standard. In the meantime, the MS  
288 product fragments did not contain 218.1234 [M+H-120]<sup>+</sup> and 248.1234 [M+H-90]<sup>+</sup> from  
289 parent ion 338.1234 [M+H]<sup>+</sup> of IAA glucoside, which were the characterize fragments of *C*-  
290 glucosides (Chen *et al.*, 2015). Therefore, the product was predicted to be IAA-*N*-glucoside.  
291 As to notify, this product was also commonly found in seeds of *G. biloba* (Supporting  
292 Information Figure S3). It indicated that IAA-*N*-glucoside could be produced through the *N*-  
293 glucosylation of IAA in plant.

294

## 295 **The specificity of GbNGT1**

296

297 The enzymatic ability of GbNGT1 under pH 5.0 (138.55 nkat/mg protein), 6.0 (133.56  
298 nkat/mg protein) and 7.0 (129.83 nkat/mg protein) for IAA-Asp were obvious higher than  
299 that under pH 8.0 (71.92 nkat/mg protein), indicated that it could tolerant acid (Supporting  
300 Information Figure S4). Significant differences of enzymatic ability were not found between  
301 at 25°C (81.37 nkat/mg protein) and 35°C (80.06 nkat/mg protein), whereas the catalyzed  
302 activities at 45°C (0.92 nkat/mg protein) and 55°C (0.37 nkat/mg protein) were severely  
303 weakened (Supporting Information Figure S); it indicated that GbNGT1 was sensitive to high  
304 temperature. In buffers with different metal ions, the enzymatic activity did not change  
305 significantly; the result showed the vitality of GbNGT1 was independent to metal ions  
306 (Supporting Information Figure S4).

307

308 Fifty-two substrates were tested for exploring whether GbNGT1 possessed substrate diversity  
309 the same as UGT72B1, MiCGT and TcCGT1; only three IAA-AAs could be glucosylated to  
310 form their corresponding IAA-AA-*N*-glucosides by MS and NMR (Supporting Information  
311 Figure S5 and Table S5&6), the converse rates were 92.3%, 23.7% and 80.5% towards IAA-  
312 Glu, IAA-Gly and IAA-Leu, respectively. In order to investigate the relationship between  
313 substrate electron density and enzymatic activity, we synthesized various kinds of IAA and  
314 IAA-AA derivatives as substrates, which incorporated strong electron donor moiety or  
315 electron absorption capacity (Supporting Information Appendix). Towards IAA-AAs adding  
316 electron donor or absorption moieties to the benzene ring, GbNGT1 directly lost its catalytic  
317 activity (Figure 2a). Similarly, the enzyme could not catalyze modified IAA when the  
318 electron donor or electron acceptor group was added. These results demonstrated that the  
319 activity of GbNGT1 was sensitive to electron and very likely strictly depend on steric  
320 stabilization.

321

322 Except for IAA and IAA-AA derivatives, 25 indole or aniline derivatives were used to test  
323 the universal activity of GbNGT1. It was found that GbNGT1 could not glucosylate IAA  
324 analogues, such as IBA, IPA and NAA. Furthermore, GbNGT1 could not catalyze aniline or  
325 indole derivatives to form new glycosylation products (Figure 2b), whatever the substitutes  
326 (-OH, methyl or ethyl) were nearby NH<sub>2</sub> or N. These results suggested that GbNGT1 was a  
327 specificity *N*-glucosyltransferase, which strictly defined the substrate structure, tiny  
328 modification or changes of substrate could cause steric hindrance thereby directly affected  
329 the affinity between enzyme and substrate.

330

331 Ginkgo contains various kinds and a great number of flavonoid glucosides, thus it is  
332 reasonable to test whether GbNGT1 could catalyze flavonoids. 10 flavonoids including  
333 flavone, flavonol and proanthocyanidin monomers were used as substrates (Figure 2c);  
334 however, GbNGT1 could not catalyze any of the tested flavonoids. These results also  
335 indicated that GbNGT1 could not glucosylate the common *C*-position or *O*-position of  
336 substrates like other NGTs.

337

### 338 **The 15th residue Glu (E) determined the *N*-glucosylation function of GbNGT1**

339

340 Based on crystal structures of UGT72B1 (PDB No., 2VCH) glycosylated toward *N*-, *S*- and  
341 *O*-position and PtUGT1 (5NLM) glucosylated at the OH of indoxyl (Brazier-Hicks *et al.*,  
342 2007; Hsu *et al.*, 2018), we simulated the protein models of GbNGT1; obtained two model  
343 structures similarity between UGT72B1 and PtUGT1 were 31% and 30%, correspondingly.  
344 The former was selected to imitate molecular docking with UDP-glucose and IAA or IAA-  
345 AAs (Supporting Information Table S7). Among the 5 small molecules, the totally needed  
346 energy for IAA was the highest; it suggested that the enzymatic activity toward IAA would

347 be lower comparing to IAA-AAAs, which was coincided with our above experimental results  
348 (Figure 2a).

349

350 Docking results of IAA-Asp, UDP-glucose and protein model showed that there were eight  
351 key residues for binding substrates: His (H381), Trp (W384), Asn (N385) and Gln (Q386)  
352 were related to UDP-glucose by Hydrogen bond, while Glu (E15), Gln (Q16), Gly (G17) and  
353 Gly (G383) bonded to IAA-Asp by van der Waals interactions (Figure 3a & Supporting  
354 Information Fig S6). Alignments among GbNGT1, UGT72B1 and PtUGT1 showed the above  
355 mentioned residues were identical in position except E15 and G16 (Supporting Information  
356 Figure S6).

357

358 Four GbNGT1 mutants were obtained by site-directed mutagenesis (Supporting Information  
359 Figure S7), including E15G, Q16M, E15A and double mutant of E15 and Q16, E15G-Q16M.  
360 Enzymatic tests showed that the activity of E15G and E15G-Q16M were abolished toward  
361 IAA-Asp; while E15A and Q16M still possess different catalyzed ability toward IAA-Asp  
362 (Figure 3b&d). E15A enzymatic efficiency towards IAA-Asp was dramatically increased  
363 comparing to native protein, with the  $k_{cat}/K_m$  value significantly changing from  $9.69 \text{ S}^{-1} \text{ mM}^{-1}$   
364  $^1$  to  $422.38 \text{ S}^{-1} \text{ mM}^{-1}$ . On the contrary, the  $k_{cat}/K_m$  value of Q16M towards IAA-Asp was  
365 decreased by  $4.67 \text{ S}^{-1} \text{ mM}^{-1}$ . These results clarified that the combination of GbNGT1 and its  
366 substrates was sensitive to electron circumstance and steric distribution, which coincided with  
367 the conclusion of GbNGT1 enzymatic specificity.

368

369 Towards IAA, the enzymatic activities of mutants showed similar tendency with IAA-Asp;  
370 none glucosylation product was detected in the enzymatic experiments with E15G, Q16M or  
371 E15G-Q16M toward IAA. It is worth notifying that Ala replaced Glu in E15A could enhance  
372 the enzymatic efficiency towards IAA-Asp, but conversely reduced it towards IAA (Figure

373 3c). These results designated that E15 site of GbNGT1 determined its *N*-glucosylation  
374 towards IAA and IAA-Asp.

375

### 376 **The *in vivo* function of GbNGT1 in *N. benthamiana***

377

378 The *in vivo* function of GbNGT1 functionality was tested by *Agrobacterium tumefaciens*-  
379 mediated transient expression assay in *N. benthamiana* (Figure 4a, Supporting Information  
380 Figure S2). GbNGT1 coding sequences was cloned under the 35S promoter for the  
381 constitutive expression in *N. benthamiana*. Not surprisingly, IAA, IAA-Asp and IAA-Asp-  
382 *N*-glucoside were not detected in transgenic or wild type tobaccos by HPLC.

383

384 Therefore, IAA or IAA-Asp substrates were fed to the tobacco leaves. The corresponding  
385 products IAA-*N*-glucoside and IAA-Asp-*N*-glucoside could be found in *GbNGT1*-  
386 transformed tobacco leaves, but could not be detected in the control. The loss of function of  
387 mutant E15G was also verified in *N. benthamiana*, whatever towards IAA or IAA-Asp  
388 (Supporting Information Figure S7), accord with the enzymatic results.

389

390 For reconstructing the IAA modification in tobacco, *AtGH3.6* were introduced as it catalyzed  
391 the formation of IAA-Asp from IAA (Staswick *et al.*, 2005). Expectedly, both IAA-*N*-  
392 glucoside and IAA-Asp-*N*-glucoside could be detected in *AtGH3.6*- and *GbNGT1*-  
393 transformed leaves adding IAA. Meanwhile, 11 candidates GbGH3s genes were transient  
394 expressed in tobacco with GbNGT1, only *GbGH3.5* instead of *AtGH3.6*, above two IAA *N*-  
395 glucosides were detected in *GbGH3.5*- and *GbNGT1*-transformed leaves (Figure 4b&c).  
396 Interestingly, IAA-*O*-glucoside was found in the control after adding IAA, while only IAA-  
397 *N*-glucoside was detected in *GbNGT1*-transformed leaves. In a word, the identification of

398 GbNGT1 improves IAA metabolic pathway by directly filling the gap of the *N*-glucosylation  
399 of IAA or IAA-AA (Figure 5).

400

401

## 402 **Discussion**

403

### 404 **Discovery of IAA-Asp-*N*-glucoside enriching in ginkgo seeds promotes the supplement** 405 **of IAA metabolic pathway**

406

407 IAA is generally found trace amount in plants although in various styles, including IAA-  
408 esters (such as, IAA-*O*-glucoside) and IAA-AAs (Tam *et al.*, 2000). The seeds of maize  
409 contained 79.5  $\mu\text{g/g}$  D.W. total IAA which was the highest one ever reported in literatures;  
410 while it was just 8  $\mu\text{g/g}$  D.W. in oat seeds, and less than 1  $\mu\text{g/g}$  D.W. in other tested plants  
411 (Bandurski *et al.*, 1977). Herein, we found amazing amount of IAA-Asp-*N*-glucoside existed  
412 in ginkgo seeds. During 58 ginkgo cultivars, the IAA-Asp-*N*-glucoside content was up to 4  
413 mg/g D.W., over thousand times comparing to that  $\sim 0.15$   $\mu\text{g/g}$  D.W. in rice seeds, the only  
414 plant which tested the content of this compound in published report (Kai *et al.*, 2007).  
415 Meanwhile, slight IAA-*N*-glucoside was also detected by UPLC-QTOF in ginkgo seeds. The  
416 biosynthetic pathway of IAA-Asp-*N*-glucoside or IAA-*N*-glucoside, also called IAA *N*-  
417 glucosylation pathway, was totally unidentified due to the trace amount and few species that  
418 contain them, ever if these compounds were found in Scots pine 20 years ago (Ljung *et al.*,  
419 2001).

420

421 In this work, we found out IAA-Asp-*N*-glucoside commonly hyper-accumulating in ginkgo  
422 seeds through large scale resource screening. After differential transcriptome analysis, we  
423 firstly cloned and systematically identified specificity IAA *N*-glucosyltransferase (NGT)  
424 which completed the metabolic network of IAA. Based on the GbNGT1 enzyme activity



425 toward IAA or IAA-Asp and the widely studied IAA-*O*-glucoside pathway, the formation of  
426 IAA *N*-glycoside may through two ways: (i) Amino acid is firstly added to IAA to form IAA-  
427 AA by GH3s; then it is glucosylated to IAA-Asp-*N*-glucoside by UGTs. Alternatively, (ii)  
428 IAA-*N*-glucoside is firstly produced by UGTs glucosylating IAA *N*-position; after that, GH3s  
429 catalyze it to format IAA-Asp-*N*-glucoside (Figure5). The result of transient expressed  
430 *GbNGT1* and *GbGH3.5* in tobacco have provide the possibility existed of first status, however,  
431 there may be differentiation or diversification of GH3s in ginkgo needing more GH3s  
432 function exploration.

433

434 The known metabolic pathway of IAA includes *O*-glucosyltransferases and amino acid  
435 conjugate synthetases. The OGTs and GH3s directly affect the existence form and dynamic  
436 equilibrium of IAA in plants; therefore regulate plant growth and development. The first  
437 reported IAA *O*-glucosyltransferase is IAGLU from maize identified in 1994 (Szerszen *et al.*,  
438 1994); subsequently, this kind of OGTs in Arabidopsis, duckweed, cauliflower, soybean,  
439 tomato, rice and tobacco were identified. They widely affected the structure, growth and  
440 development of plants, such as leaf angle and structure, dwarf, flower development via  
441 regulating the balance of IAA in plant (Ostrowski *et al.*, 2014). Along with the identification  
442 of GH3 family which catalyzed the formation of IAA-amino acid in Arabidopsis, the GH3s  
443 in rice, moss, pea (*Pisum sativum*) and strawberry were reported to involve in anti-pathogen,  
444 shoot cell elongation, lateral root development and geotropism of root (Ding *et al.*, 2008;  
445 Ostrowski *et al.*, 2016; Tang *et al.*, 2019). As a powerful enzyme, GbNGT1 not only  
446 determines the new IAA metabolic branch, but also plays an important role in downstream  
447 modification of the known IAA-AA branch. The identification of GbNGT1 largely  
448 complements the metabolic network of IAA; opens up new directions for homeostasis study  
449 of IAA in plant; and finally, must promotes the discovery of new IAA regulation models in  
450 medicinal plant.

451

452 As the main product of IAA amino acid conjugates, IAA-Asp was considered to be the  
453 irreversible form of IAA and no use in plant till its hydratases were found (Ljung K, 2013).  
454 In Chinese cabbage (*Brassica rapa*) the enzymatic activity of IAA-Asp hydrolysis increased  
455 in *Plasmodiophora brassicae*-infected root galls compared with control roots (Ludwig-  
456 Müller *et al.*, 1996); in *M. truncatula*, MtIAR31, -32, -33, and -34 had hydrolytic activity  
457 against IAA-Asp and IBA-Ala (Campanella *et al.*, 2008). At present, IAA-*N*-glucoside was  
458 also considered as a more stable pattern comparing to IAA-*O*-glucoside (Casanova-S áez *et*  
459 *al.*, 2019). However, such high content of IAA-Asp-*N*-glucosides concentrates in ginkgo  
460 seeds, what is the reason? And what kind of physiological function do they act? Are there  
461 any special hydratases which could cleave C-N bond to free IAA in ginkgo? Those questions  
462 should be paid more attention to in the future.

463

#### 464 **Specificity of *N*-glucosylation**

465

466 *N*-glycosylation modification in proteins or peptides is more common than in small molecules.  
467 Asparagine (Asn) was generally considered as the main amino acid site for *N*-glycosylation  
468 in peptides; this modification of Asn is characterized by covalent attachment of an  
469 oligosaccharide to its side chain amide (Chung *et al.*, 2017). GbNGT1 could glucosylate small  
470 molecules including IAA-Asp, IAA-Glu, IAA-Leu, or IAA-Gly at the *N*-position of IAA  
471 residue, but not at the amide nitrogen of these amino acid residues' side chain. Our results  
472 confirm the comment that the catalytic mode of *N*-glycosyltransferases towards small  
473 molecules and proteins are different (Naegeli *et al.*, 2014).

474

475 IAA *N*-glucosides existed in monocotyledons (rice and maize) and dicotyledons (Arabidopsis,  
476 *Lotus japonicus*,) (Kai *et al.*, 2007), gymnosperms (Scots pine and ginkgo) (Ljung *et al.*, 2001)  
477 and even in microbes (*Cortinarius brunneus*) (Teichert *et al.*, 2008); it means that the enzymes  
478 contributed to biosynthesis these compounds should be conserved. The homologous genes of

479 OGTs for IAA or NGTs for other small molecules could be easily found in different species.  
480 It suggested that the UGT amino acid sequences are related to their function in plants.  
481 OsIAGLU showed 67% amino acid identity with ZmIAGLU, which possessed the same  
482 function to glucosylate the hydroxyl of IAA (Yu et al., 2019). Similarly, BnUGT1 and  
483 AtUGT72B1 shared 85% sequence identity and the same *O*-glycosylation function toward  
484 3,4-dichlorophenol; differentially, only AtUGT72B1 could glucosylate the *N*-position of 3,4-  
485 dichloroaniline (Brazier-Hicks *et al.*, 2007). Unusually, the highest similarity among  
486 GbNGT1 and other UGTs is just 44% from *Picea sitchensis* (GenBank: ABR17691.1) when  
487 blasted in NCBI database; moreover, the homologous genes of GbNGT1 could not be found  
488 by blasting the default value even in ginkgo genome. These results suggest that the catalytic  
489 capacity of *N*-glucosyltransferase toward IAA or IAA-AA may less dependent on amino acid  
490 sequences but mainly rely on protein structure.

491

492 The reported *N*-glucosyltransferases usually catalyze the different type glycosylation  
493 reactions at diversity sites. AtUGT72B1 could conduct the *O*-glycosylation of 2,4,5-  
494 trichlorophenol, *N*-glycosylation of 2,3-dichloroaniline and *S*-glycosylation of 4-  
495 chlorothiophenol (Brazier-Hicks *et al.*, 2007). MiCGT could glycosylate the *C*-position of  
496 maclurin, *O*- position of phenol and *N*- position of 3,4-dichloroaniline (Chen *et al.*, 2015).  
497 TcCGT1 was identified to catalyze four types of glycosylation, the *C*- or *O*-position of  
498 phenols and flavonoids, the *N*-position of 3,4-dichloroaniline, and *S*-position of 3,4-  
499 chlorothiophenol (He *et al.*, 2019). In contrast, GbNGT1 specifically catalyzes the *N*-  
500 glucosylation toward IAA or IAA-AA.

501

502 Generally speaking, the relatively reserved PSPG motif located in C terminal of UGTs was  
503 bond to sugar donor, while the diversity residues close to N terminal were bond to sugar  
504 acceptor, which determined the specific selection of substrates (Ostrowski *et al.*, 2014). So  
505 far, very few key residues in N terminal were identified even if some crystal structures of  
506 NGTs were revealed. H24 and E396 of TcCGT1 were demonstrated to play key role in the

507 stabilization and location of small molecule substrates; in addition, the mutants I94E and  
508 G284K of TcCGT1 could convert enzymatic activity from *C*- to *O*- position (He *et al.*, 2019).  
509 After converting all five amino acid residues within 314-320 of BnUGT1 to the  
510 corresponding key amino acids in UGT72B1, BnUGT1 gained the function of *N*-  
511 glycosylation activity toward 2,3-dichloroaniline. The *O*-glycosylation activity of UGT72B1  
512 mutant H19Q was severely decreased toward 3,4-dichlorophenol, with  $k_{cat}$  value reducing to  
513 1/300 of that in native protein. Simultaneously, the *N*-glycosylation capacity of H19Q toward  
514 3,4-dichloroaniline was also dropped to 1/2 of that in native protein (Brazier-Hicks *et al.*,  
515 2007). In our study, amino acid alignments revealed H18 nearby N terminal of GbNGT1 was  
516 corresponding to the critical sites H19 in AtUGT72B1 and H24 in TcCGT1. Docking analysis  
517 identified another special residue E15 binding to IAA-Asp in GbNGT1. Mutating E15  
518 (Glutamic acid) to E15G (Glycine) indeed drastically decreased or even abolished the  
519 catalytic activity of *N*-glycosylation toward IAA-Asp or IAA *in vitro* and *in vivo*; whereas,  
520 converting E15 to E15A (Alanine) oppositely enhanced enzymatic efficiency by forty-fold  
521 comparing to native protein toward IAA-Asp. E15 is another N terminal critical residue  
522 determining the specificity of substrates besides His in N-terminal of GbNGT1, which  
523 provides a new reference site for reconstruction of NGTs.

524

## 525 **The application prospect of GbNGT1**

526

527 Ginkgo flavonoids and ginkgolides had been widely used as important drug and dietary  
528 supplements in the world (Su *et al.*, 2017). IAA-Asp-*N*-glucoside was mentioned as the main  
529 pharmacological compound in ginkgo for inhibiting cough, antiasthmatic and eliminating  
530 phlegm (Liu *et al.*, 2018); furthermore, there were considerable pharmacological studies on  
531 IAA derivatives or indole alkaloids, for instance, IAA induced cell death in combination with  
532 UV-B irradiation by increasing apoptosis in PC-3 prostate cancer cells (Kim *et al.*, 2010);  
533 indole-*N*-glucosides have the potential to serve as a novel SGLT2-selective inhibitors  
534 (Sodium-Glucose cotransporter) to cure type II diabetes (Nomura *et al.*, 2013). It indeed

535 suggests that IAA derivates own pharmaceutical developing prospect. GbNGT1 not only has  
536 high specific activity toward IAA-AA, but also possesses spatial specificity; furthermore,  
537 IAA-Asp-N-glucoside was produced from IAA in tobacco after transforming *GbGH3.5* and  
538 *GbNGT1*; it indicated that these proteins are potential engineering enzymes for the  
539 biosynthesis of IAA-AA-*N*-glucoside.

540

## 541 **Conclusions**

542

543 The *N*-glucosylation of IAA or IAA-amino acids in auxin metabolism had been neglected  
544 over decades, our work for GbNGT1 redeems the missing chain of auxin metabolic pathway.  
545 The unique *N*-glucosylation function and high efficiency of GbNGT1 in IAA metabolic  
546 pathway distinguish the uncommon protein from other published *N*-glycosyltransferases with  
547 multiple functions; the function determined crucial residue (E15) nearby N terminal inspires  
548 new way exploring for glucosyltransferase modification. The surprising abundant  
549 accumulation of IAA metabolites in ginkgo seeds promotes the discovery of this neglected  
550 branch; it sets up a good example for enriching major metabolic studying in special medicinal  
551 plants.

552

## 553 **Supplementary data**

554

555 Figures S1. The IAA-AA-*N*-glucosides content of different cultivars. (a) The IAA-Asp-*N*-  
556 glucoside content in seeds of 58 cultivars. (b) The IAA-Glu-*N*-glucoside content in seeds of  
557 58 cultivars.

558

559 Figures S2. IAA-*N*-glucoside existed in ginkgo seeds. (a) MS spectrums extracted 338.1234  
560 from samples of enzymatic product, ginkgo seeds and IAA-*O*-glucoside. (b) The MS  
561 spectrum related to chart A.

562

563 Figures S3. GbNGT1 expressed in *E.coli* and *N. benthamiana*. (a) SDS-PAGE gel of  
564 recombinant GbNGT1 protein; (b) and (c) transient expressed GFP or GbNGT1-GFP in  
565 tobacco was confirmed by LB 985 NightShade (Berthold Techonologies) and OLYMPUS  
566 IX73, respectively, WT, wildtype, EV, empty vector.

567

568 Figures S4. The enzymatic activity of GbNGT1 toward IAA-Asp substrate in solution at  
569 different pH value (a), temperature (b) and metal ion (c).

570

571 Figures S5. HPLC and MS spectrums of GbNGT1 with IAA-Glu (a, S2), IAA-Gly (b, S3),  
572 and IAA-Leu (c, S4). Negative ion PI model was used to detect the three substrates, S2a, S3a  
573 and S4a are the new products in enzymatic reactions.

574

575 Figures S6. The key residues predicted by docking. (a) Amino acid alignment of GbNGT1,  
576 AtUGT72B1 and PtUGT1, asterisks for binding amino acids. (b) The overall chart of  
577 GbNGT1 docking with UDPG and IAA-Asp, the molecule marked yellow and orange is  
578 UDPG that marked pink is IAA-Asp.

579

580 Figures S7. The functions of GbNGT1 mutants in *E. coli* and *N. benthamiana*. (a) The SDS-  
581 PAGE gel of native and mutant recombinant proteins of GbNGT1. M, maker; CK, empty  
582 vector. (b) The HPLC spectrums of *N. benthamiana* leaves transformed mutant E15G or  
583 GbNGT1: (i) mutant E15G-transformed leaves adding IAA-Asp; (ii) GbNGT1-transformed  
584 leaves adding IAA-Asp; (iii) mutant E15G-transformed leaves adding IAA; (iv), GbNGT1-  
585 transformed leaves adding IAA. Red arrow, new product; green arrow, substrate.

586

587 Tables S1. The 58 ginkgo cultivars used in our study.

588

589 Tables S2. The transcripts of 13 UGTs and 11 GbGH3s from the public data. I-fruit, immature  
590 fruit, R-fruit, ripe fruit.

591

592 Tables S3. The transcripts of cloned UGTs and GH3s according to transcriptome data  
593 collected on June 15th, 2018

594

595 Tables S4. <sup>1</sup>H-NMR and <sup>13</sup>C-NMR spectrum data of IAA-Asp-N-Glc compounds

596

597 Tables S5. <sup>1</sup>H-NMR and <sup>13</sup>C-NMR spectrum data of IAA-Gly-N-Glc compounds

598

599 Tables S6. <sup>1</sup>H-NMR and <sup>13</sup>C-NMR spectrum data of IAA-Leu-N-Glc compounds

600

601 Tables S7. The predicted docking energy of GbNGT1 with IAA and IAA-AAs. The output  
602 data included total energy (Kcal/mol), van der Waals interactions (VDW, Kcal/mol),  
603 Hydrogen bonding (HBond, Kcal/mol), electrostatic interactions (Elec Kcal/mol), and  
604 average conpair (AverConPair).

605

606 Appendix S. Synthesis of Substrates and NMR information for used compounds.

607

608 **Acknowledgments**

609

610 We thank Dr. Xiaoyan Han (Institute of Botany, Chinese Academy of Sciences) for key  
611 suggestions and subtle corrections about the paper. This research was supported by Beijing  
612 Natural Science Foundation of China (7192138), the National Natural Science Foundation of  
613 China (81703647), the Fundamental Research Funds for the Central public welfare research  
614 institutes of China (ZZ13-YQ-097), and National Key R&D Program of China  
615 (2019YFC1711100).

616

### 617 **Author Contributions**

618 QY and AL designed research; QY, JZ, SW, JC, HG, and CG performed research; QY, AL  
619 and LM collected samples; QY, JZ, and HG analyzed data; and QY wrote the paper; SC, and  
620 AL revised the paper

621

### 622 **Declaration of interests**

623

624 The authors declare that they have no known competing financial interests or personal  
625 relationships that could have appeared to influence the work reported in this paper.

626

627

628

629

### 630 **References**

631

632 Bandurski RS, Schulze A (1977) Concentration of indole-3-acetic acid and its derivatives in plants. *Plant*  
633 *Physiology* **60**: 211-213.

634 Brazier-Hicks M, Offen WA, Gershater MC, Revett TJ, Lim EK, Bowles DJ, Davies GJ, Edwards R  
635 (2007) Substrate specificity and safener inducibility of the plant UDP-glucose-dependent family 1  
636 glycosyltransferase super-family. *Proceedings of The National Academy of Sciences of The United*  
637 *States of America* **104**: 20238-20243.

638 Campanella JJ, Smith SM, Leibu D, Wexler S, Ludwig-Müller J (2008) The auxin conjugate hydrolase  
639 family of *Medicago truncatula* and their expression during the interaction with two symbionts.  
640 *Journal of Plant Growth Regulation* **27**: 26–38.

641 Casanova-Sánchez R, Voß U (2019) Auxin metabolism controls developmental decisions in land plants.  
642 *Trends In Plant Science* **24**: 741-754.

643 Chen D, Chen R, Wang R, Li J, Xie K, Bian C, Sun L, Zhang X, Liu J, Yang L, *et al.* (2015) Probing the  
644 catalytic promiscuity of a regio- and stereospecific C-glycosyltransferase from *Mangifera indica*.  
645 *Angewandte Chemie-International Edition* **54**: 12678-12682.

646 Chung CY, Majewska NI, Wang Q, Paul J T, Betenbaugh MJ (2017) N-glycosylation processing  
647 pathways across kingdoms. *Cell* **171**: 258.



- 648 Ding X, Cao Y, Huang L, Zhao J, Xu C, Li X, Wang S (2008) Activation of the indole-3-acetic acid-  
649 amido synthetase GH3-8 suppresses expansin expression and promotes salicylate- and jasmonate-  
650 independent basal immunity in rice. *Plant Cell* **20**: 228-240.
- 651 Guan R, Zhao Y, Zhang H, Fan G, Liu X, Zhou W, Shi C, Wang J, Liu W, Liang X, *et al.* (2016) Draft  
652 genome of the living fossil *Ginkgo biloba*. *Gigascience* **5**: 49.
- 653 Guo Z, Li J, Qin H, Wang M, Lv X, Li X, Chen Y (2015) Biosynthesis of the carbamoylated D-  
654 gulosamine moiety of streptothricins: involvement of a guanidino-*N*-glycosyltransferase and an *N*-  
655 acetyl-D-gulosamine deacetylase. *Angewandte Chemie-International Edition* **54**: 5175-5178.
- 656 He JB, Zhao P, Hu ZM, Liu S, Kuang Y, Zhang M, Li B, Yun CH, Qiao X, Ye M (2019) Molecular and  
657 structural characterization of a promiscuous *C*-glycosyltransferase from *Trollius chinensis*.  
658 *Angewandte Chemie-International Edition* **58**: 11513-11520.
- 659 Hsu TM, Welner DH, Russ ZN, Cervantes B, Prathuri RL, Adams PD, Dueber JE (2018) Employing a  
660 biochemical protecting group for a sustainable indigo dyeing strategy. *Nature Chemical Biology* **14**:  
661 256-261.
- 662 Jackson RG, Lim EK, Y Li, Kowalczyk M, Sandberg G, Hoggett J, Ashford DA, Bowles DJ (2001)  
663 Identification and biochemical characterization of an *Arabidopsis* indole-3-acetic acid  
664 glucosyltransferase. *Journal of Biological Chemistry* **276**: 4350-4356.
- 665 Kai K, Wakasa K, Miyagawa H (2007) Metabolism of indole-3-acetic acid in rice: identification and  
666 characterization of *N*-beta-D-glucopyranosyl indole-3-acetic acid and its conjugates. *Phytochemistry*  
667 **68**: 2512-2522.
- 668 Kim SY, Ryu JS, Li H, Park WJ, Yun HY, Baek KJ, Kwon NS, Sohn UD, Kim DS (2010) UVB-activated  
669 indole-3-acetic acid induces apoptosis of PC-3 prostate cancer cells. *Anticancer Research* **30**: 4607-  
670 4612.
- 671 Korasick DA, Enders TA, Strader LC (2013) Auxin biosynthesis and storage forms. *Journal of*  
672 *Experimental Botany* **64**: 2541-2555.
- 673 Liu Q, Chen TT, Xiao DW, Zhao SM, Lin JS, Wang T, Li YJ, Hou BK (2019) *OsiAGT1* is a  
674 glucosyltransferase gene involved in the glucose conjugation of auxins in rice. *Rice* **12**: 92.
- 675 Liu A, Cheng JT, Guo C, Zhang J, Chen C (2018) Indole acetic acid derivative and preparation method  
676 and pharmaceutical use thereof. *Patent*. **WO**: 223819A1.
- 677 Ljung K (2013). Auxin metabolism and homeostasis during plant development. *Development* **140**: 943-  
678 950.
- 679 Ljung K, Ostin A, Lioussanne LG (2001) Sandberg, Developmental regulation of indole-3-acetic acid  
680 turnover in Scots pine seedlings. *Plant Physiology* **125**: 464-475.
- 681 Ludwig-Müller J, Epstein E, Hilgenberg W (1996) Auxin-conjugate hydrolysis in Chinese cabbage:  
682 Characterization of an amidohydrolase and its role during infection with clubroot disease,  
683 *Physiologia Plantarum* **97**: 627-634.
- 684 Naegeli A, Michaud G, Schubert M, Lin CW, Lizak C, Darbre T, Reymond JL, Aebi M (2014) Substrate  
685 specificity of cytoplasmic *N*-glycosyltransferase. *Journal of Biological Chemistry* **289**: 24521-24532.
- 686 Nomura S, Yamamoto Y, Matsumura Y, Ohba K, Sakamaki S, Kimata H, Nakayama K, Kuriyama C,  
687 Matsushita Y, Ueta K *et al.* (2013) Novel indole-*N*-glucoside, TA-1887 as a Sodium Glucose  
688 Cotransporter 2 Inhibitor for treatment of type 2 diabetes. *ACS Medical Chemistry Letters* **5**: 51-55.
- 689 Ostrowski M, Jakubowska A (2014) UDP-Glycosyltransferase of plant hormones. *Advanced Cell Biology*  
690 **4**: 43-60.
- 691 Ostrowski M, Mierek-Adamska A, Porowińska D, Goc A, Jakubowska A (2016) Cloning and  
692 biochemical characterization of indole-3-acetic acid-amino acid synthetase PsGH3 from pea. *Plant*  
693 *Physiology And Biochemistry* **107**: 9-20.
- 694 Rautengarten C, Ebert B, Moreno I, Temple H, Herter T, Link B, Do ñas-Cofré D, Moreno A, Sa éz-  
695 Aguayo S, Blanco F, Mortimer JC *et al.* (2014) The Golgi localized bifunctional UDP-  
696 rhamnose/UDP-galactose transporter family of *Arabidopsis*. *Proceedings of The National Academy*  
697 *of Sciences of The United States of America* **111**: 11563-11568.
- 698 Staswick PE, Serban B, Rowe M, Tiryaki I, Maldonado MT, Maldonado MC, Suzaa W (2005)  
699 Characterization of an *Arabidopsis* enzyme family that conjugates amino acids to indole-3-acetic  
700 acid. *Plant Cell* **17**: 616-627.



- 701 Su X, Shen G, Di S, Dixon RA, Pang Y (2017) Characterization of UGT716A1 as a multi-substrate  
702 UDP:flavonoid glucosyltransferase gene in *Ginkgo biloba*. *Frontiers in Plant Science* **8**: 2085.
- 703 Szerszen JB, Szczyglowski K, Bandurski RS (1994) *iaglu*, a gene from *Zea mays* involved in conjugation  
704 of growth hormone indole-3-acetic acid. *Science* **265**: 1699-1701.
- 705 Tam YY, Epstein E, Normanly J (2000) Characterization of auxin conjugates in *Arabidopsis*. Low steady-  
706 state levels of indole-3-acetyl-aspartate, indole-3-acetyl-glutamate, and indole-3-acetyl-glucose.  
707 *Plant Physiology* **123**: 589-596.
- 708 Tang Q, Yu P, Tillmann M, Cohen JD, Slovin JP (2019) Indole-3-acetylaspartate and indole-3-  
709 acetylglutamate, the IAA-amide conjugates in the diploid strawberry achene, are hydrolyzed in  
710 growing seedlings. *Planta* **249**: 1073-1085.
- 711 Teichert A, Schmidt J, Porzel A, Arnold N, Wessjohann L (2008) *N*-glucosyl-1H-indole derivatives from  
712 *Cortinarius brunneus* (Basidiomycetes). *Chemistry & Biodiversity* **5**: 664-669.
- 713 Yin Q, Han X, Han Z, Chen Q, Shi Y, Gao H, Zhang T, Dong G, Xiong C, Song C, *et al.* (2020) Genome-  
714 wide analyses reveals a glucosyltransferase involved in rutin and emodin glucoside biosynthesis in  
715 tartary buckwheat. *Food Chemistry* **318**: 126478.
- 716 Yin Q, Shen G, Chang Z, Tang Y, Gao HW, Pang Y (2017) Involvement of three putative  
717 glucosyltransferases from the UGT72 family in flavonol glucoside/rhamnoside biosynthesis in *Lotus*  
718 *japonicus* seeds. *Journal of Experimental Botany* **68**: 597-612.
- 719 Yu XL, Wang HY, Leung DWM, He ZD, Zhang JJ, Peng XX, Liu EE (2019) Overexpression of  
720 *OsIAAGLU* reveals a role for IAA-glucose conjugation in modulating rice plant architecture. *Plant*  
721 *Cell Reports* **38**: 731-739.
- 722 Zhao P, Bai L, Ma J, Zeng Y, Li L, Zhang Y, Lu C, Dai H, Wu Z, Li Y, *et al.* (2008) Amide *N*-  
723 glycosylation by Asm25, an *N*-glycosyltransferase of ansamitocins. *Cell Chemical Biology* **15**: 863-  
724 874.
- 725
- 726

727 **Figure legends**

728

729 Figure 1. GbNGT1 catalyzed the formation of IAA-*N*-glucoside and IAA-Asp-*N*-glucoside.  
730 (a) The IAA-Asp-*N*-glucoside content in different tissues at the development stages. (b) The  
731 transcript levels of nine cloned GbUGTs in samples collected in June 15. (c) The new IAA-  
732 Asp-glucoside occurred in enzymatic products by HPLC and MS. (d) The new IAA-*N*-  
733 glucoside occurred in enzymatic products by HPLC and MS.

734 Figure 2. The enzymatic specificity of GbNGT1 as *N*-glucosyltransferase. (a) The  
735 conversion rates of GbNGT1 toward IAA-Asp, IAA-Asp derivatives, IAA, IAA analogues,  
736 and IAA derivatives. NA means no product detected. (b) The list of indole amide or anilines  
737 which could not be glycosylated by GbNGT1. (c) The flavonoids list which could not be  
738 glycosylated by GbNGT1.

739 Figure 3. E15 determined the catalyzed activity of GbNGT1. (a) the binding domain of  
740 GbNGT1 docking with UDPG and IAA-Asp, the molecule marked yellow and orange is  
741 UDPG, that marked pink is IAA-Asp. (b) HPLC chromatograms of enzymatic products,  
742 which including native or mutants, UDPG and IAA-Asp. (c) HPLC chromatograms of  
743 enzymatic products, which including native or mutants, UDPG and IAA. (d) The kinetic  
744 data of native and mutants towards IAA-Asp, Averages (SD), n=3. Red arrow, product;  
745 green arrow, substrate.

746 Figure 4. Functional Characterization of GbNGT1 in *N. benthamiana*. (a) The HPLC  
747 spectrums of *N. benthamiana* leaves with or without *GbNGT1*, wildtype and empty vector  
748 (EV): (i) wild type; (ii) empty vector-transformed leaves; (iii) *GbNGT1*-transformed leaves,  
749 (iv), empty vector -transformed leaves adding IAA-Asp, (v), *GbNGT1*-transformed leaves  
750 adding IAA-Asp, insert picture is the UV spectrum of product, (vi), empty vector-  
751 transformed leaves adding IAA; (vii) *GbNGT1*-transformed leaves adding IAA, insert  
752 picture is the UV spectrum of product. (b) GH3s and GBNGT1 reconstructed the IAA-Asp-  
753 *N*-Glucoside formation in tobacc. (c) the contents of IAA-*N*-glucosides in tobacco leaves  
754 transient expressed different genes combination, “/” means no product detected by HPLC,  
755 Averages (SD), n=3.

756 Figure 5. The renewed IAA metabolism pathway. The character G in IAA-*O*-G or IAA-  
757 Asp-*N*-G means glucoside.

758

759

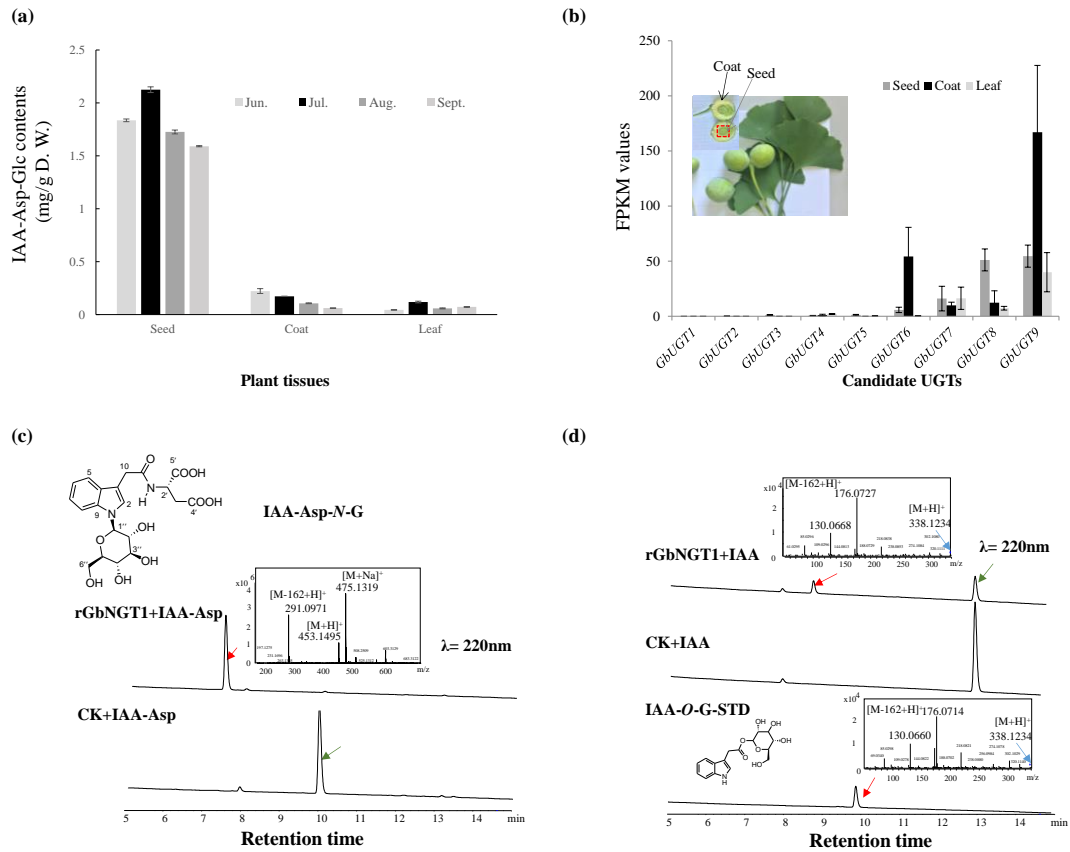

760

761 Figure 1. GbNGT1 catalyzed the formation of IAA-*N*-glucoside and IAA-Asp-*N*-glucoside.  
 762 (a) The IAA-Asp-*N*-glucoside content in different tissues at the development stages. (b) The  
 763 transcript levels of nine cloned GbUGTs in samples collected in June 15. (c) The new IAA-  
 764 Asp-glucoside occurred in enzymatic products by HPLC and MS. (d) The new IAA-*N*-  
 765 glucoside occurred in enzymatic products by HPLC and MS.

766

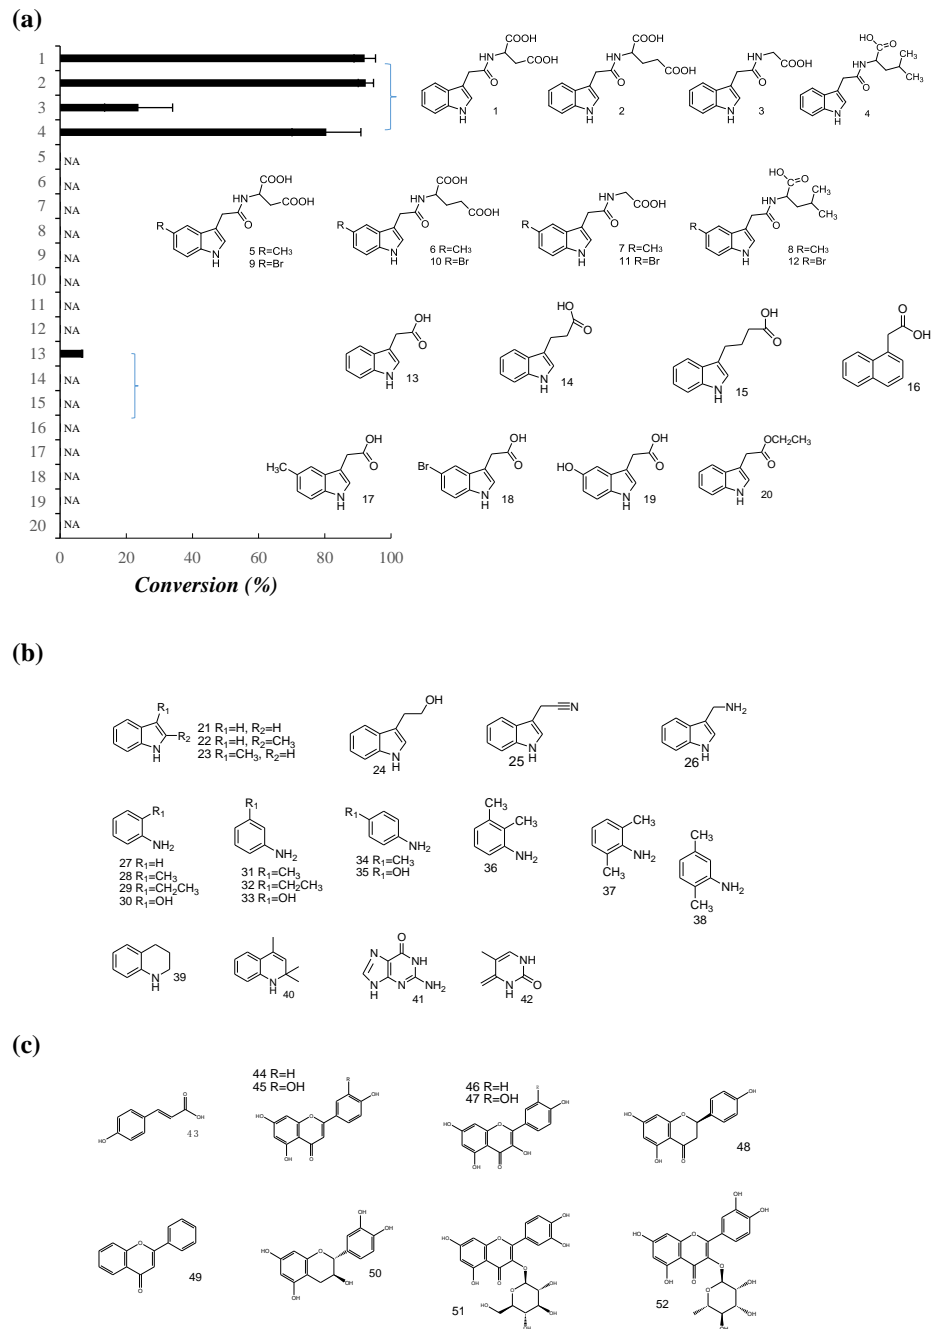

767

768 Figure 2. The enzymatic specificity of GbNGT1 as *N*-glucosyltransferase. (a) The  
 769 conversion rates of GbNGT1 toward IAA-Asp, IAA-Asp derivatives, IAA, IAA analogues,  
 770 and IAA derivatives. NA means no product detected. (b) The list of indole amide or anilines  
 771 which could not be glycosylated by GbNGT1. (c) The flavonoids list which could not be  
 772 glycosylated by GbNGT1.

773

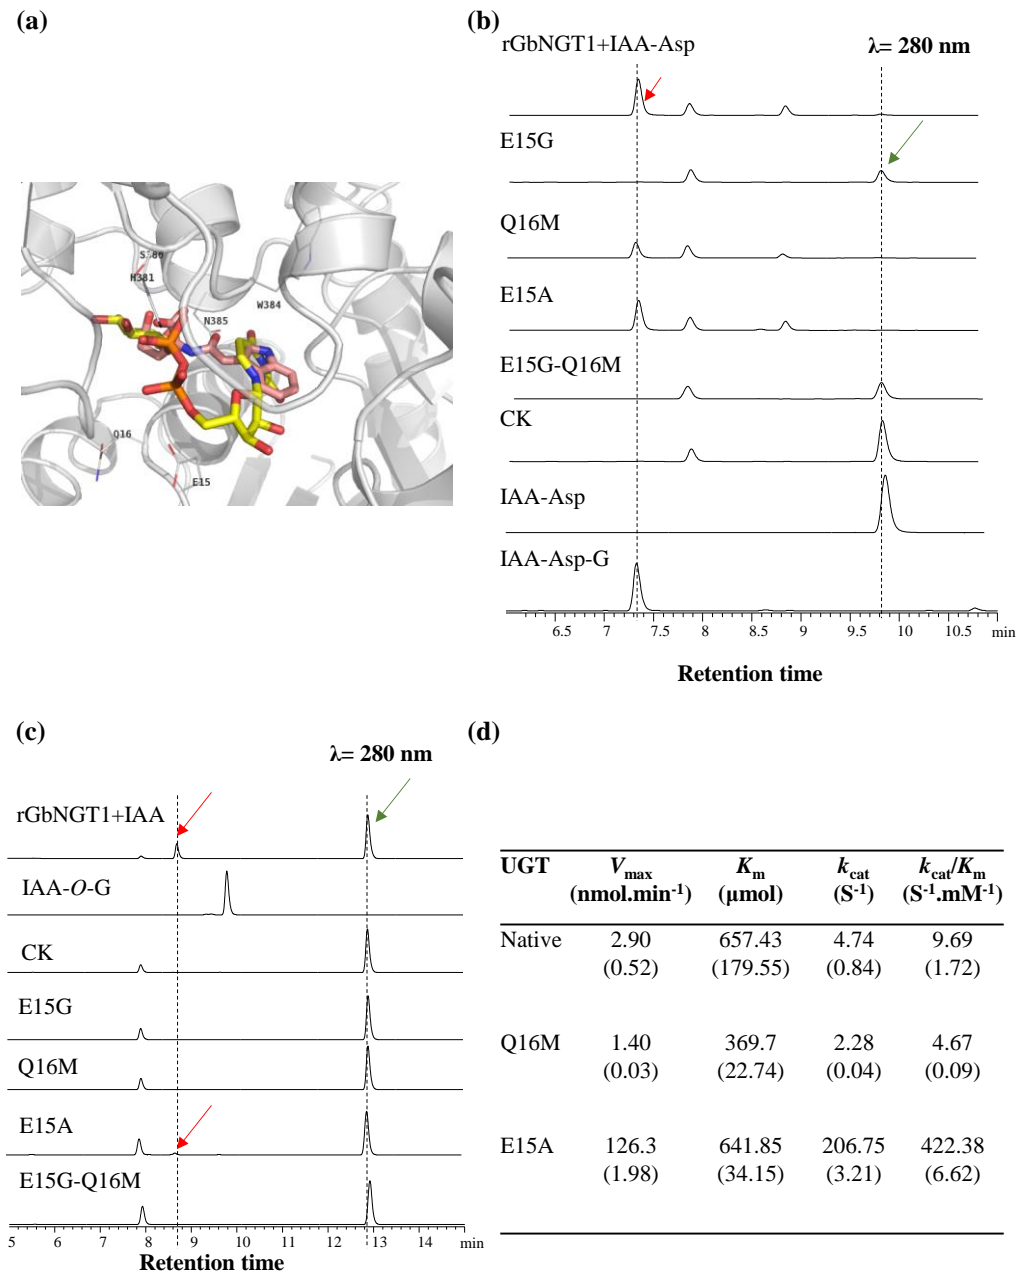

774

775 Figure 3. E15 determined the catalyzed activity of GbNGT1. (a) the binding domain of  
 776 GbNGT1 docking with UDPG and IAA-Asp, the molecule marked yellow and orange is  
 777 UDPG, that marked pink is IAA-Asp. (b) HPLC chromatograms of enzymatic products,  
 778 which including native or mutants, UDPG and IAA-Asp. (c) HPLC chromatograms of  
 779 enzymatic products, which including native or mutants, UDPG and IAA. (d) The kinetic  
 780 data of native and mutants towards IAA-Asp, Averages (SD), n=3. Red arrow, product;  
 781 green arrow, substrate.

782

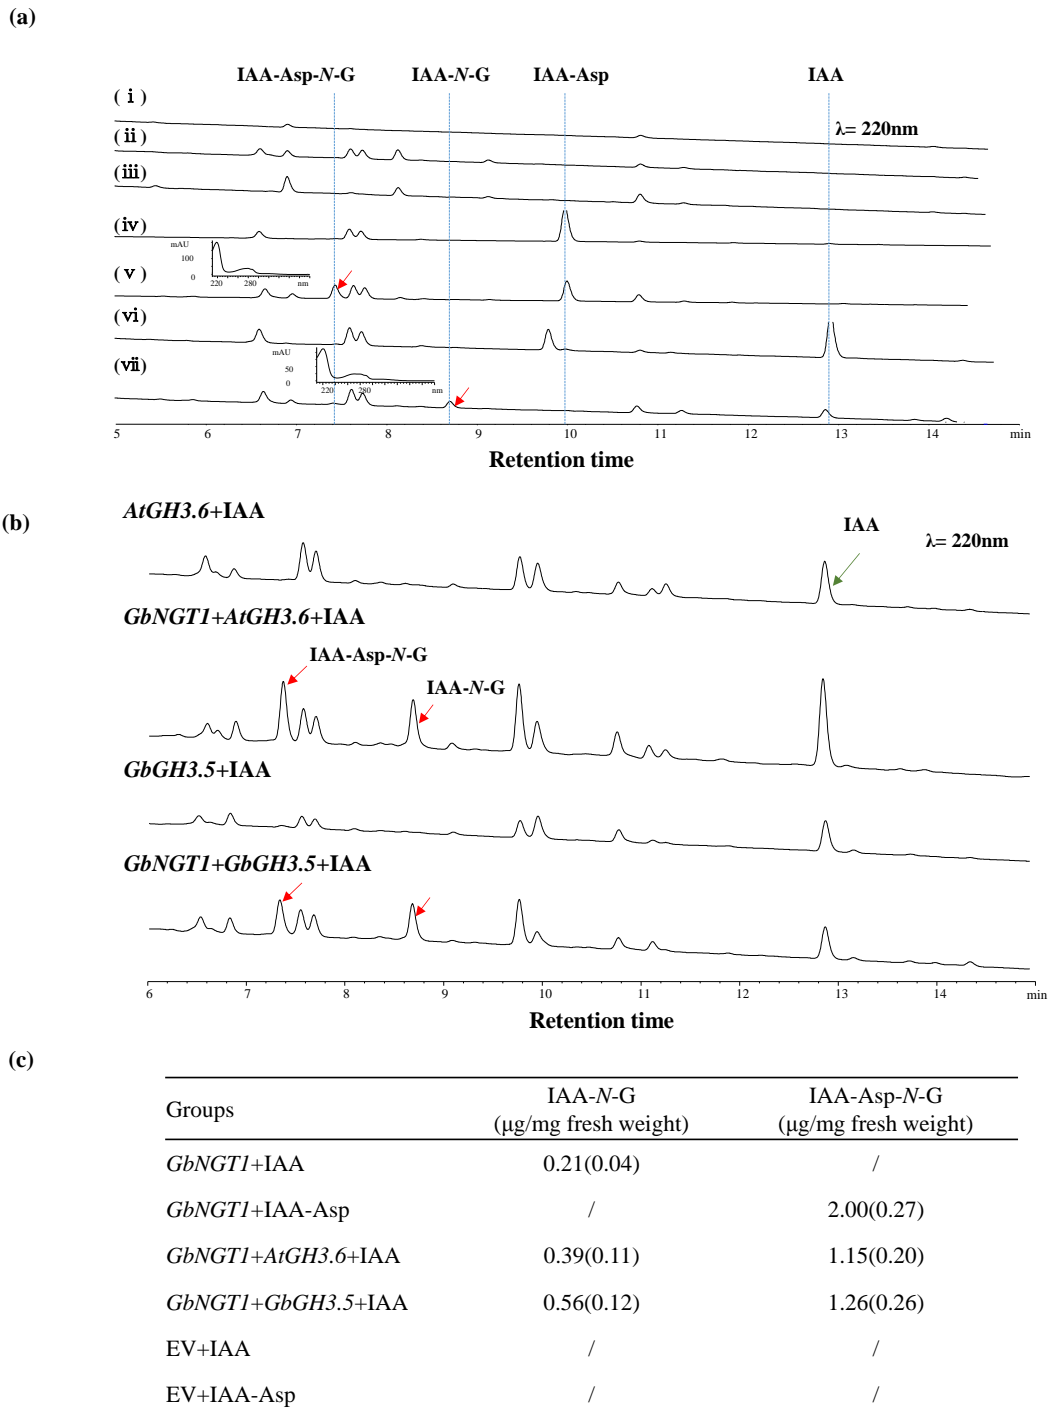

783

784 Figure 4. Functional Characterization of GbNGT1 in *N. benthamiana*. (a) The HPLC  
 785 spectrums of *N. benthamiana* leaves with or without *GbNGT1*, wildtype and empty vector  
 786 (EV): (i) wild type; (ii) empty vector-transformed leaves; (iii) *GbNGT1*-transformed leaves,  
 787 (iv),empty vector -transformed leaves adding IAA-Asp, (v), *GbNGT1*-transformed leaves  
 788 adding IAA-Asp, insert picture is the UV spectrum of product, (vi),empty vector-

789 transformed leaves adding IAA; (vii) *GbNGT1*-transformed leaves adding IAA, insert  
790 picture is the UV spectrum of product. (b) GH3s and GBNGT1 reconstructed the IAA-Asp-  
791 N-Glucoside formation in tobacc. (c) the contents of IAA-*N*-glucosides in tobacco leaves  
792 transient expressed different genes combination, “/” means no product detected by HPLC,  
793 Averages (SD), n=3.

794

795

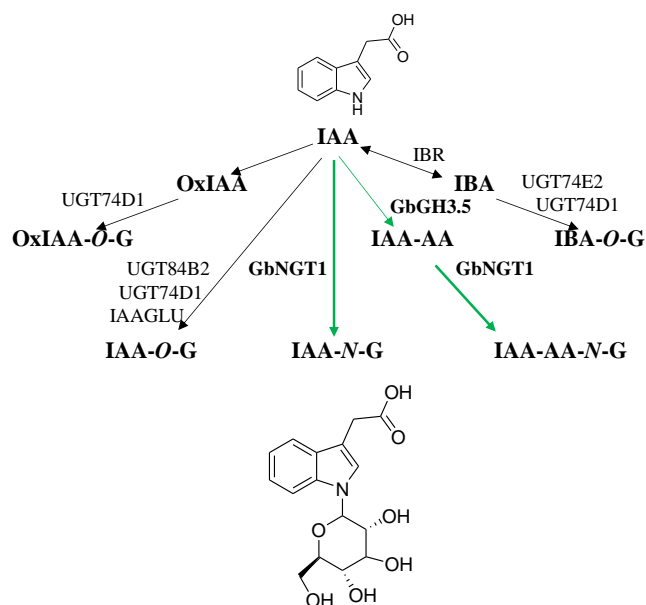

796

797 Figure 5. The renewed IAA metabolism pathway. The character G in IAA-O-G or IAA-  
798 Asp-N-G means glucoside.

799
